# Supplementary material
Source: MDPI journal article supplement (https://www.mdpi.com/1424-2818/13/9/448)
Supplement: s1 [file s1]

**Supplementary material.**

**Table S1.** Sampling localities, number of obtained sequences and GenBank accession numbers.

| Species                          | Locality                             | Coordinates      | GenBank accession numbers            |          |                             |          |
|----------------------------------|--------------------------------------|------------------|--------------------------------------|----------|-----------------------------|----------|
|                                  |                                      |                  | COI                                  | N of seq | ITS/18S                     | N of seq |
| <i>Attheyella crassa</i>         | Lake Geneva, Switzerland             | 46°27'N, 06°31'E | MH477669-MH477671                    | 3        | MN038095-MN038096           | 2        |
|                                  | Lake Pääjärvi, Finland               | 61°04'N, 25°08'E | MH477643-MH477645                    | 3        | MN038090                    | 1        |
|                                  | Creek Hiiu, Estonia                  | 59°38'N, 24°67'E | MH477651                             | 1        | MN038083-MN038085           | 3        |
|                                  | Lake Sognefjell, Norway              | 59°58'N, 10°43'E | MH477663-MH477668                    | 6        | MN038098-MN038099           | 2        |
|                                  | Stora Le, Norway                     | 59°18'N, 11°46'E | -                                    | -        | MN038100                    | 1        |
|                                  | Lake Vänern, Sweden                  | 58°55'N, 13°30'E | MH477652, MH477653                   | 2        | MN038094                    | 1        |
|                                  | Nyuvchim reservoir, Komi, Russia     | 61°39'N, 50°74'E | MH477638-MH477639                    | 2        | MN038088-MN038089           | 2        |
|                                  | Pechora River, Nenetsia, Russia      | 68°18'N, 54°22'E | MH477650                             | 1        | MN038091                    | 1        |
|                                  | Karkalai Creek, Udmurtia, Russia     | 56°98'N, 52°40'E | MH477654, MH477655                   | 2        | MN038086                    | 1        |
|                                  | Lake Narach, Belarus                 | 54°87'N, 26°69'E | MH477646-MH477649                    | 4        | MN038087                    | 1        |
|                                  | Rybinsk reservoir, Russia            | 58°08'N, 38°28'E | MH477640-MH477642, MH477656-MH477662 | 10       | MN038092-MN038093, MN038096 | 3        |
|                                  | Vychegda river, Komi, Russia         | 61°69'N, 50°87'E | MW844032                             | 1        | -                           | -        |
|                                  | Lake Glubokoe, Moscow region, Russia | 55°75'N, 36°50'E | MW844033                             | 1        | -                           | -        |
| <i>Canthocamptus staphylinus</i> | Lake Geneva, Switzerland             | 46°27'N, 06°31'E | MG209733-MG209737, MN737556-MN737558 | 8        | MN061654, MN061655          | 2        |
|                                  | Lake Zurich, Switzerland             | 47°14'N, 08°40'E | MN737564                             | 1        | -                           | -        |
|                                  | Lake Pääjärvi, Lammi, Finland        | 61°04'N, 25°08'E | KP974713-KP974729; MG209708-MG209711 | 11       | MN061649-MN061652           | 4        |
|                                  | Lake Võrtsjärv, Estonia              | 57°40'N, 26°40'E | MG209728-MG209732                    | 5        | MN061657, MN061658          | 2        |
|                                  | Lake Vänern, Sweden                  | 58°55'N, 13°30'E | MG209712-MG209720                    | 9        | MN061653                    | 1        |
|                                  | Lake Narach, Belarus                 | 54°87'N, 26°69'E | MN737559-MN737563                    | 5        | MN061659                    | 1        |

|                             |                                                    |                   |                                      |    |                   |   |
|-----------------------------|----------------------------------------------------|-------------------|--------------------------------------|----|-------------------|---|
|                             | Orlov pond, St. Petersburg, Russia                 | 59°51'N, 30°02'E  | MG209721-MG209727, KC627284-KC627286 | 10 | MN061656          | 1 |
|                             | Northern Germany                                   |                   | MF077881                             | 1  | -                 | - |
|                             | Lake Plau am see, Germany                          | 53°49'N, 12°37'E  | MN737568-MN737569                    | 2  | -                 | - |
|                             | Lake Stechlin, Germany                             | 53°14'N, 13°03'E  | MN737571-MN737572                    | 2  | -                 | = |
|                             | Lake Fernsteinsee, Austria                         | 47°34'N, 10°81'E  | MN737567                             | 1  | -                 | - |
|                             | Lake Zell am see, Austria                          | 47°33'N, 10°81'E  | MN737565-MN737566                    | 2  | -                 | - |
|                             | Lake Hallstatt, Austria                            | 47°55'N, 13°65'E  | MN737570                             | 1  | -                 | - |
| <i>Eucyclops serrulatus</i> | Orlov pond, St. Petersburg, Russia                 | 59°51'N, 30°02'E  | KC627302-KC627306                    | 5  | MK185423-MK185431 | 9 |
|                             | Pond in the Tauride Garden, St. Petersburg, Russia | 59°56'N, 30°22'E  | KC627297-KC627320                    | 4  | MK185433          | 1 |
|                             | Lake Creteil, Paris, France                        | 48°50'N, 2°20'E   | KC627310-KC627311                    | 2  | -                 | - |
|                             | Italy, Florence                                    | 43°47'N, 11°15'E  | KC986941-KC986942                    | 2  | -                 | - |
|                             | Pond in Oslo, Norway                               | 59°54'N, 10°45'E  | KC627317-KC627319                    | 3  | -                 | - |
|                             | Pond of Golubinoe village, Zakarpattia, Ukraine    | 48°25'N, 23°17'E  | KC627298-KC627301, KC627321          | 5  | -                 | - |
|                             | Dniester Liman, Odesskii region, Ukraine           | 46°15'N, 30°21'E  | KC627313-KC627316, KC627322          | 5  | -                 | - |
|                             | River Karkalai, Udmurtia, Russia                   | 57°42'N, 52°29'E  | KC627312, MN256869-MN256873          | 6  | MK185432          | 1 |
|                             | River Severnaya Dvina, Arkhangelsk, Russia         | 64°33'N, 40°32'E  | MN256867                             | 1  | -                 | - |
|                             | River Lena, Yakutia, Russia                        | 72°38'N, 128°52'E | MN256868                             | 1  | -                 | - |
| <i>Nitokra hibernica</i>    | Lake Narach, Belarus                               | 54°87'N, 26°69'E  | MT477895-MT477897                    | 3  | -                 | - |
|                             | Lake Võrtsjärv, Estonia                            | 57°40'N, 26°40'E  | MT477898-MT477899                    | 2  | -                 | - |
|                             | Lake Pyhäjärvi, Finland                            | 63°35'N, 25°57'E  | MT477893-MT477894                    | 2  | -                 | - |
|                             | Lake Hallstatt, Austria                            | 47°55'N, 13°65'E  | MT477902                             | 1  | -                 | - |
|                             | Lake Müritz, Germany                               | 53°25'N, 12°41'E  | MT477900-MT477901                    | 2  | -                 | - |

**Table S2.** Primer sequences for PCR amplification and sequencing.

| Gene region | Primers name | Direction | Sequence (5'-3')                          | Reference |
|-------------|--------------|-----------|-------------------------------------------|-----------|
| COI         | HCO 2198     | Forward   | TAAACTTCAGGGTGACCAAAAAATCA                | [1]       |
|             | LCO1490      | Reverse   | GGTCAACAAATCATAAAGATATTGG                 |           |
|             | ZplankF1_t1  | Forward   | TGTAAAACGACGGCCAGTTCTASWAATCATAARGATATTGG | [2]       |
|             | ZplankR1_t1  | Reverse   | CAGGAAACAGCTATGACTTCAGGRTGRCCRAARAATCA    |           |
| ITS         | ITS-4        | Forward   | TCCTCCGCTTATTGATATGC                      | [3]       |
|             | ITS-5        | Reverse   | GGAAGTAAAAGTCGTAACAAGG                    |           |
| 18S         | 18Sf         | Forward   | TACCTGGTTGATCCTGCCAG                      | [4]       |
|             | 614r         | Reverse   | TCCAACCTACGAGCTTTTAAACC                   |           |
|             | 554f         | Forward   | AAGTCTGGTGCCAGCAGCCGC                     |           |
|             | 1282r        | Reverse   | TCACTCCACCAACTAAGAACGGC                   |           |
|             | 1150f        | Forward   | ATTGACGGAAGGGCACCACCAG                    |           |
|             | 18Sr         | Reverse   | TAATGATCCTTCCGCAGGTTAC                    |           |

1. Folmer O, Black M, Hoeh W, Lutz R, Vrijenhoek R. DNA primers for amplification of mitochondrial cytochrome c oxidase subunit I from diverse metazoan invertebrates. *Mol Mar Biol Biotechnol.* 1994, 3(5), 294-9. PMID: 7881515.
2. Prosser, S., Martínez-Arce, A., Elías-Gutiérrez, M. A new set of primers for COI amplification from freshwater microcrustaceans. *Mol Ecol Resour* **2013**, 13, 1151-1155. <https://doi.org/10.1111/1755-0998.12132>
3. White, T.J. Amplification and Direct Sequencing of Fungal Ribosomal RNA Genes for Phylogenetics. In: *PCR Protocols, a Guide to Methods and Applications* **1990**, 315-322.
4. Huys R, Mackenzie-Dodds J, Llewellyn-Hughes J. Cancrincolidae (Copepoda, Harpacticoida) associated with land crabs: a semiterrestrial leaf of the ameerid tree. *Mol Phylo Evol.* **2009**, 51,143-155.

**Table S3.** Analysis of molecular variance (AMOVA) of the studied species among different populations.

| species                  | gene | Percentage of variation |                    | $\Phi$ value | p-value | Percentage of variation |               | $\Phi$ value | p-value |
|--------------------------|------|-------------------------|--------------------|--------------|---------|-------------------------|---------------|--------------|---------|
|                          |      | Among populations       | Within populations |              |         | Among clades            | Within clades |              |         |
| <i>Attheyella crassa</i> | COI  | 64.1                    | 35.8               | 0.64         | p<0.01  | 99.3                    | 0.7           | 0.99         | p<0.01  |
|                          | ITS  | 64.2                    | 35.7               | 0.64         | p=0.041 | 97.2                    | 2.8           | 0.97         | p<0.01  |
| <i>Canthocamptus</i>     | COI  | 99.4                    | 0.5                | 0.99         | p<0.01  | 96.8                    | 3.2           | 0.97         | p<0.01  |
| <i>staphylinus</i>       | 18S  | 46.2                    | 53.7               | 0.46         | p=0.057 | 7.6                     | 92.4          | 0.07         | p=0.141 |
| <i>Eucyclops</i>         | COI  | 64.9                    | 35.1               | 0.65         | p<0.01  | 99.5                    | 0.5           | 0.99         | p<0.01  |
| <i>serrulatus</i>        | ITS  | 66.2                    | 33.6               | 0.66         | p=0.097 | 59.6                    | 40.4          | 0.59         | p<0.01  |
| <i>Nitokra hibernica</i> | COI  | 99.5                    | 0.49               | 0.99         | p<0.01  | 61.3                    | 38.7          | 0.61         | p<0.01  |
